# Supplementary material for: MR1 presents microbial vitamin B metabolites to MAIT cells
Source: Springer Nature journal article supplement (doi:10.1038/nature11605), 2012-10-09

Supplementary Table 1 Data collection and refinement statistics

|                                                     | MR1                                                   |
|-----------------------------------------------------|-------------------------------------------------------|
| <b>Data collection</b>                              |                                                       |
| Space group                                         | <i>P</i> 2 <sub>1</sub> 2 <sub>1</sub> 2 <sub>1</sub> |
| Cell dimensions                                     |                                                       |
| <i>a</i> , <i>b</i> , <i>c</i> (Å)                  | 59.15, 89.78, 171.34                                  |
| α, β, γ (°)                                         | 90, 90, 90                                            |
| Resolution (Å)                                      | 89.78-3.2 (3.37-3.2) *                                |
| <i>R</i> <sub>merge</sub>                           | 26.6 (68.6)                                           |
| <i>R</i> <sub>pim</sub>                             | 16.6 (42.5)                                           |
| <i>I</i> /σ <i>I</i>                                | 4.5 (1.8)                                             |
| Completeness (%)                                    | 98.1 (95.7)                                           |
| Redundancy                                          | 3.4 (3.4)                                             |
| <b>Refinement</b>                                   |                                                       |
| Resolution (Å)                                      | 3.2                                                   |
| No. reflections                                     | 15334                                                 |
| <i>R</i> <sub>work</sub> / <i>R</i> <sub>free</sub> | 19.6/25.8                                             |
| No. atoms                                           |                                                       |
| Protein                                             | 5762                                                  |
| 6-formyl pterin                                     | 27                                                    |
| Phosphate                                           | 5                                                     |
| Chlorine                                            | 1                                                     |
| B-factors                                           |                                                       |
| Protein                                             | 38.7                                                  |
| 6-formyl pterin                                     | 46                                                    |
| R.m.s deviations                                    |                                                       |
| Bond lengths (Å)                                    | 0.010                                                 |
| Bond angles (°)                                     | 1.16                                                  |

\*Highest resolution shell is shown in parenthesis.  
Data was collected from a single crystal.

<sup>1</sup>  $R_{p.i.m} = \frac{\sum_{hkl} [1/(N-1)]^{1/2} \sum_i |I_{hkl,i} - \langle I_{hkl} \rangle|}{\sum_{hkl} \langle I_{hkl} \rangle}$

<sup>2</sup>  $R_{factor} = (\sum ||F_o| - |F_c||) / (\sum |F_o|)$  - for all data except as indicated in footnote 3.

<sup>3</sup> 5% of data was used for the *R*<sub>free</sub> calculation

Values in parentheses refer to the highest resolution bin.

**Supplementary Table 2. Contacts between MR1 and 6-formyl-pterin**

| 6-formyl pterin | MR1                   | Bond          |
|-----------------|-----------------------|---------------|
| C9              | Lys43 <sup>NZ</sup>   | Covalent link |
|                 | Lys43 <sup>CD</sup>   | VDW           |
|                 | Lys43 <sup>CE</sup>   | VDW           |
|                 | Tyr7 <sup>CD1</sup>   | VDW           |
|                 | Tyr7 <sup>CE1</sup>   | VDW           |
|                 | Tyr7 <sup>CZ</sup>    | VDW           |
| C6              | Lys43 <sup>NZ</sup>   | VDW           |
|                 | Lys43 <sup>CE</sup>   | VDW           |
|                 | Tyr7 <sup>CD1</sup>   | VDW           |
|                 | Tyr7 <sup>CE1</sup>   | VDW           |
|                 | Tyr7 <sup>CZ</sup>    | VDW           |
| N5              | Lys43 <sup>NZ</sup>   | VDW           |
|                 | Tyr7 <sup>CG</sup>    | VDW           |
|                 | Tyr7 <sup>CD1</sup>   | VDW           |
| C4A             | Trp69 <sup>CZ3</sup>  | VDW           |
| C4              | Arg9 <sup>NH2</sup>   | VDW           |
|                 | Trp69 <sup>CZ3</sup>  | VDW           |
|                 | Arg94 <sup>NH1</sup>  | VDW           |
|                 | Ile96 <sup>CD1</sup>  | VDW           |
| O4              | Arg9 <sup>NH2</sup>   | VDW           |
|                 | Trp69 <sup>CZ3</sup>  | VDW           |
|                 | Arg94 <sup>NH1</sup>  | VDW           |
|                 | Arg9 <sup>NE</sup>    | VDW           |
|                 | Tyr7 <sup>CB</sup>    | VDW           |
| N3              | Arg9 <sup>NH2</sup>   | VDW           |
|                 | Trp69 <sup>CZ3</sup>  | VDW           |
|                 | Arg94 <sup>NH1</sup>  | H-bond        |
|                 | Ile96 <sup>CG1</sup>  | VDW           |
|                 | Ile96 <sup>CD1</sup>  | VDW           |
| C2              | Arg94 <sup>NH1</sup>  | VDW           |
|                 | Ile96 <sup>CD1</sup>  | VDW           |
| N2              | Arg94 <sup>NH1</sup>  | VDW           |
|                 | Ile96 <sup>CD1</sup>  | VDW           |
|                 | Gln153 <sup>OE1</sup> | VDW           |
| N8              | Tyr62 <sup>CZ</sup>   | VDW           |
|                 | Tyr62 <sup>CE1</sup>  | VDW           |
|                 | Tyr62 <sup>OH</sup>   | VDW           |
| C7              | Tyr62 <sup>CZ</sup>   | VDW           |
|                 | Lys43 <sup>NZ</sup>   | VDW           |
|                 | Tyr62 <sup>CD1</sup>  | VDW           |
|                 | Tyr62 <sup>CE1</sup>  | VDW           |
|                 | Tyr7 <sup>CZ</sup>    | VDW           |

- Atomic contacts determined using the CCP4i implementation of *CONTACT* and a cutoff of 4.0 Å for vdw interactions and 3.3 Å for h-bond interactions.

**Supplementary Table 3**

This table highlights the MAIT activating strains of bacteria/yeast and non-activating strains of bacteria as defined by Le Bourhis et al and Gold et al 2010. In the context of MAIT activation, a defining distinction between the activating/non-activating strains is that (with the possible exception of *L. acidophilus*; note that some ambiguity pertains to the nomenclature and thus presence/absence of the riboflavin metabolic pathway of *Lactobacillus* species [www.atcc.org/]) the former possess the riboflavin metabolic pathway whereas the latter do not.

Activating Strains of bacteria:

Eschericia coli

Pseudomonas aeroginosa

Klebsiella pneumoniae

\* *Lactobacillus acidophilus*

Staphylococcus aureus

Staphylococcus epidermidis

Mycobacterium abscessus

Mycobacterium tuberculosis

Salmonella typhimurium

Non-activating Strains of bacteria:

Streptococcus group A

Enterococcus faecalis

Listeria monocytogenes

Activating Strains of yeast:

Candida albicans

Candida glabrata

Saccharomyces cerevisiae

Please see

<http://www.genome.jp/kegg/pathway/map/map00740.html>

for the KEGG Riboflavin Metabolic Pathway

References:

Le Bourhis et al. 2010

Gold et al. 2010

For the organisms identified as MAIT activating (12) and non-activating (3), analysis of these categorical data using the Fisher's exact test yields a two-tailed P value of 0.0022.

\* A Fishers exact test on all organisms excluding *L. acidophilus* (as the riboflavin pathway is uncertain in the strain of *L. acidophilus*) yields a two-tailed p value of 0.0027.

**Supplementary Figure 1. Mass spectrometry analysis of MR1 refolded with 6-FP.**

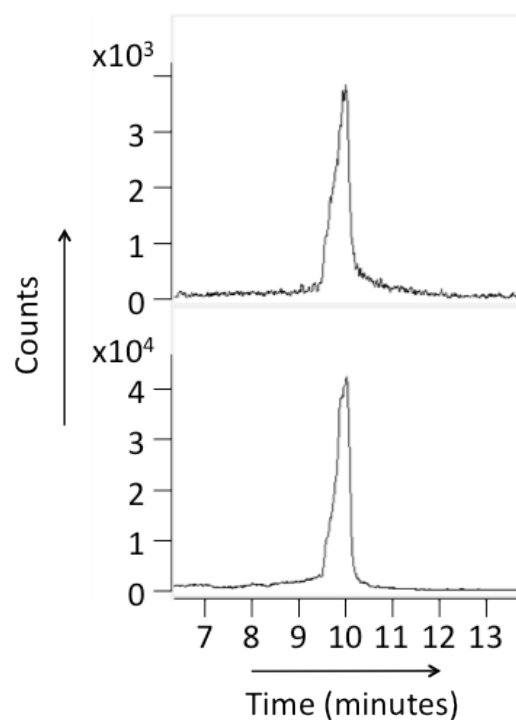

Shown are extracted ion chromatograms (EIC) of 190.0347 for 6-formyl pterin refolded with MR1 (upper panel) and 6-formyl pterin (190.0328) (lower panel), with counts on the Y-axis versus time on the X-axis. Background counts were obtained with EIC from control buffer-only samples (not shown).

**Supplementary Figure 2. Increase of MR1 surface expression by stimulatory and non-stimulatory MR1 ligands.**

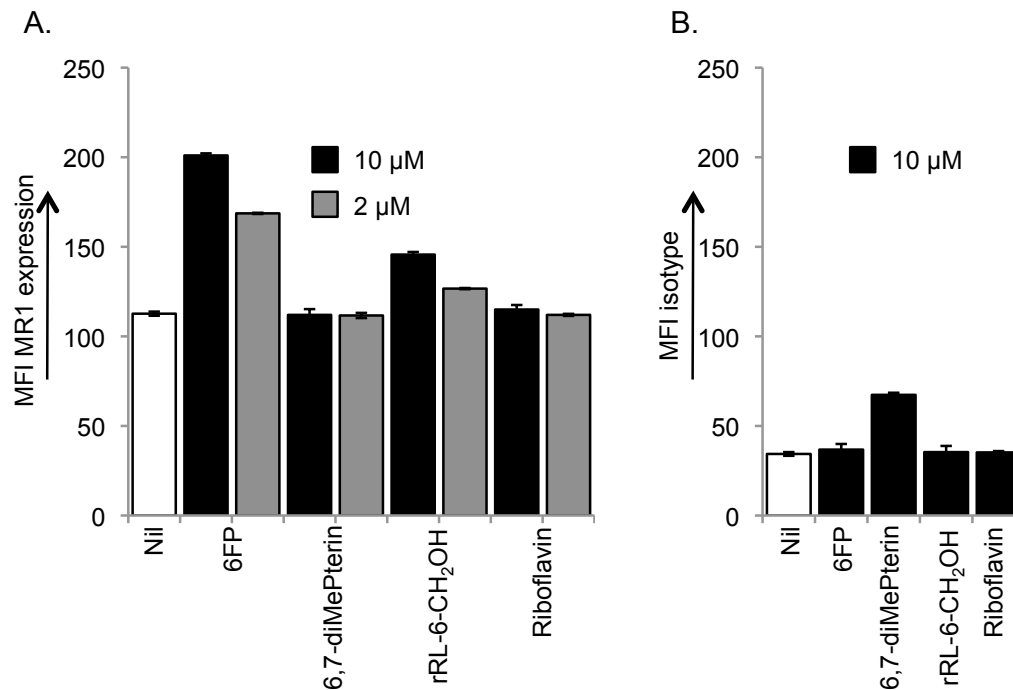

C1R cells ( $10^5$ /well in 200 $\mu$ l RF-10) were incubated for 4 hr at 37°C with compounds at 10 and 2  $\mu$ M final concentration. **A.** MR1 expression was analysed by flow cytometry using the MR1-specific Ab 26.5 and **B.** compared to an isotype control 8A5 at 10  $\mu$ g/ml followed by PE-conjugated goat-anti-mIgG (BD Pharmingen). Graphs show MFI of PE fluorescence, expressed as mean  $\pm$  SEM from triplicate samples.

## Supplementary Figure 3

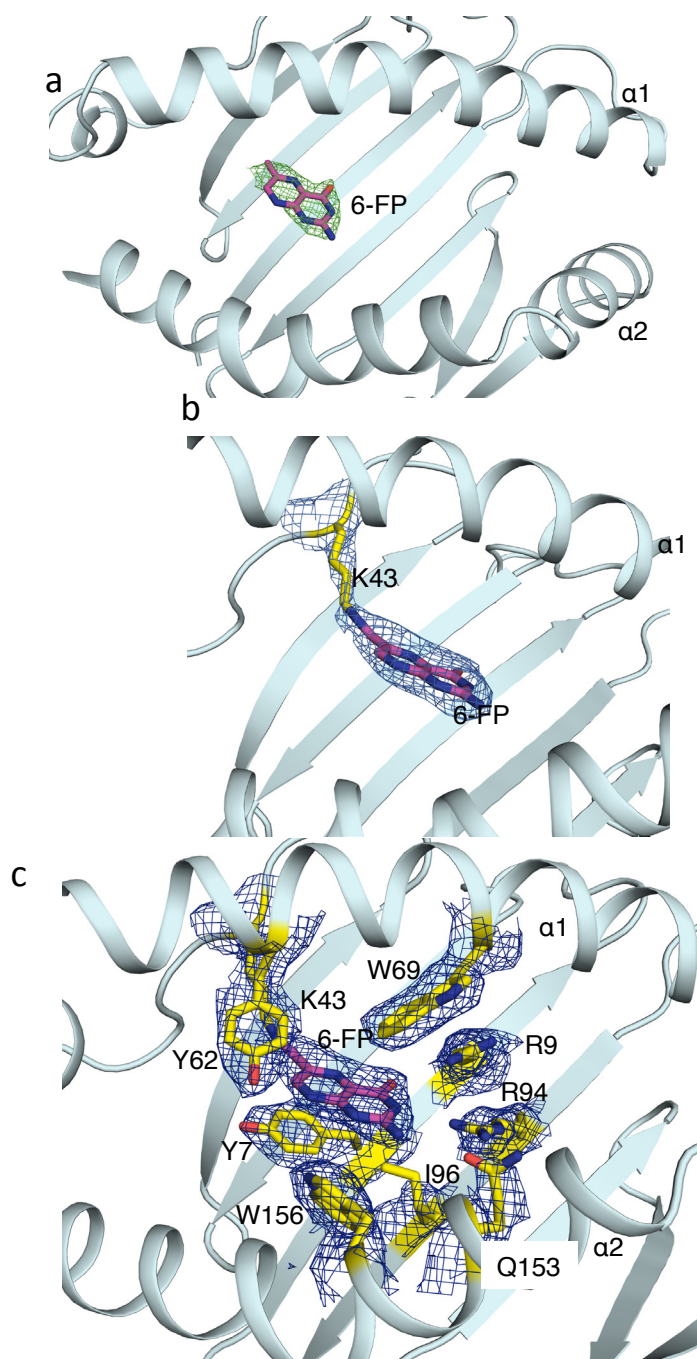

a) omit map of 6-FP contoured at  $2.5\sigma$ . b) final  $2Fo-Fc$  map of 6-FP and Lys43 of MR1 contoured at  $0.8\sigma$ . c) final  $2Fo-Fc$  map of MR1 residues that contact 6-FP contoured at  $1.0\sigma$ .

# Supplementary Figure 4. Sequence and structural comparison of MR1 and avian MHC

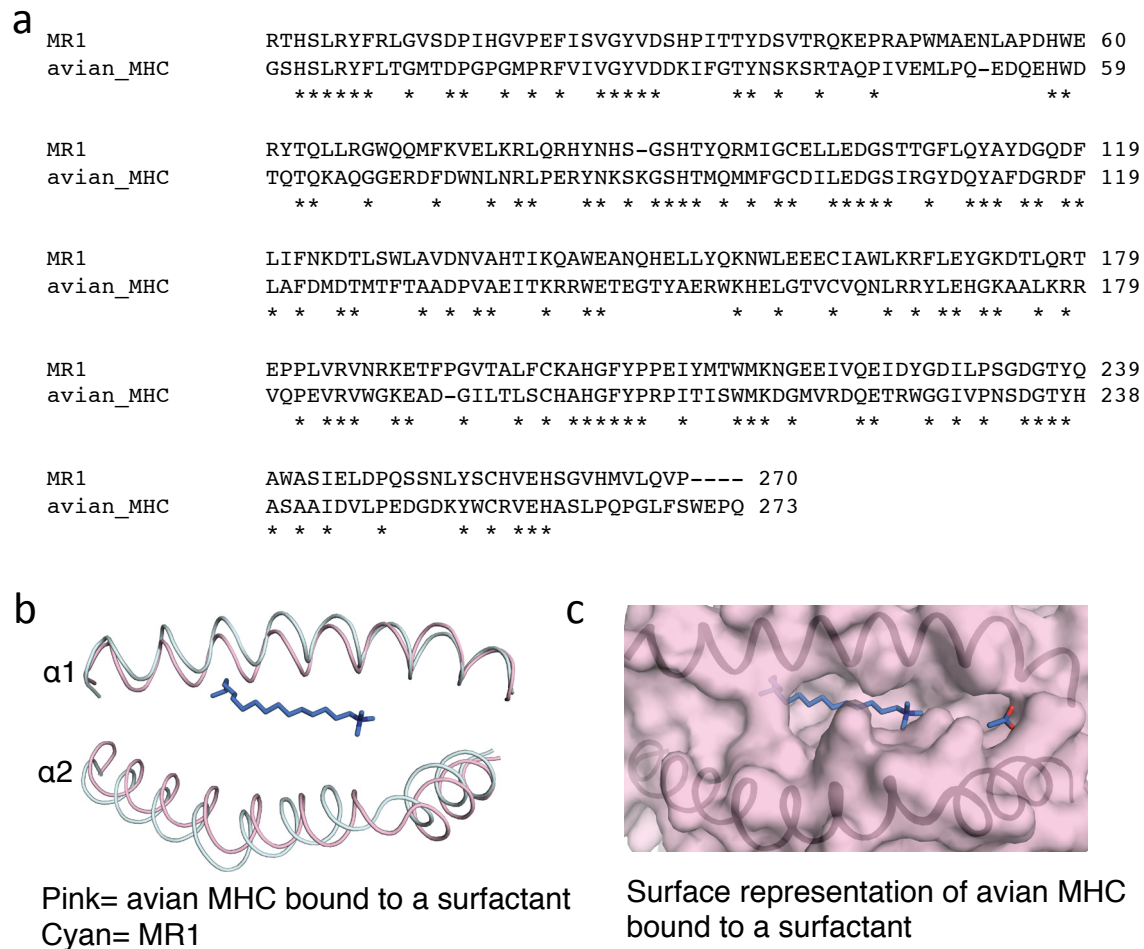

a) Sequence alignment of MR1 with avian MHC. Identical residues are shown as \*. b) overlay of  $\alpha 1$  and  $\alpha 2$  helices using the residues within the antigen binding cleft of MR1 with avian MHC (PDB code 3P73) and c) surface presentation of avian MHC bound to a surfactant. MR1, cyan; avian MHC, pink; surfactant, blue sticks.

**Supplementary Figure 5. Comparison of Ag-binding clefts of MR1, HLA-A2 and CD1d**

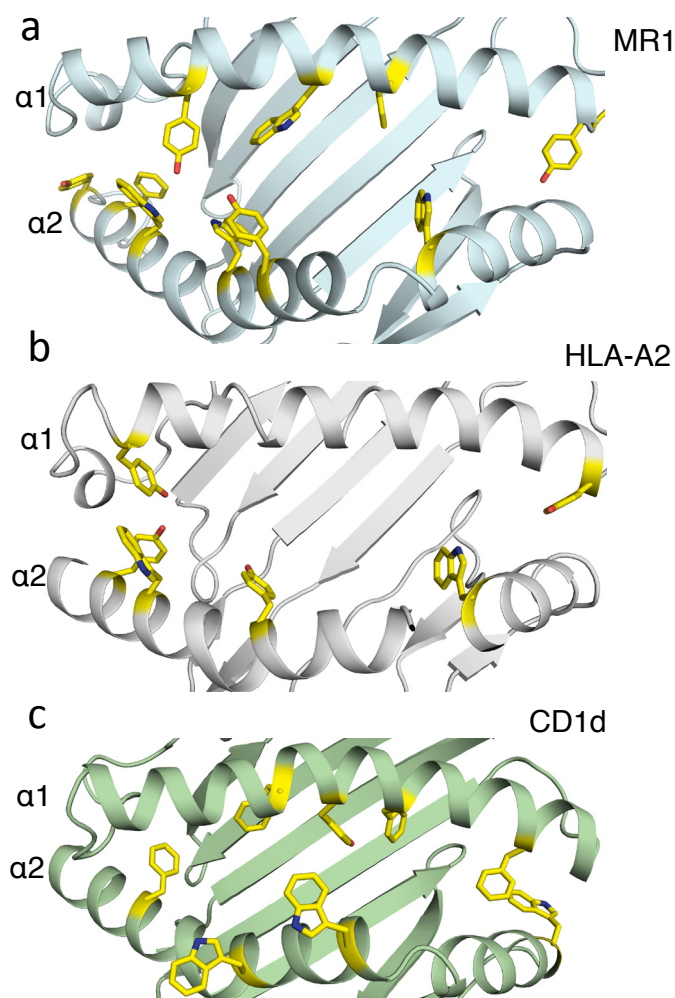

Antigen binding cleft of MR1 (a), HLA-A2 (b) and CD1d (c) showing aromatic residues in yellow on the  $\alpha 1$  and  $\alpha 2$  helices.

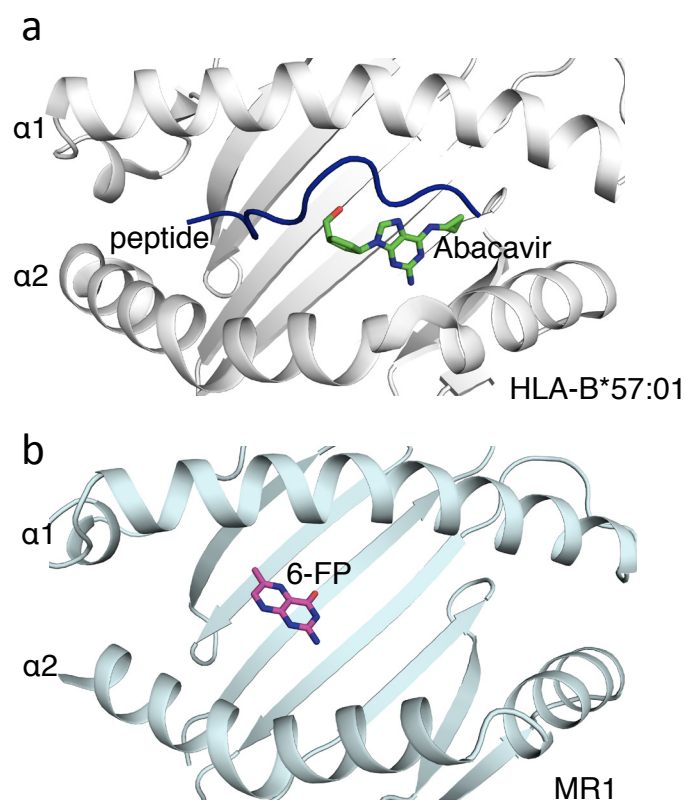

**Supplementary Figure 6. Comparison of how 6-FP binds MR1 and abacavir binds HLA B\*57:01**

a) antigen binding cleft of HLA-B\*57:01 bound to abacavir. b) antigen binding cleft of MR1 bound to 6-FP. HLA-B\*57:01, grey; peptide, blue; abacavir, green; MR1, cyan; 6-FP, magenta.

## Supplementary Figure 7. Sequence alignment of MR1 from different species

|                 |                                                              |     |
|-----------------|--------------------------------------------------------------|-----|
| human           | RTHSLRYFRLGVSDPIHGVPFISVGYVDSHPITTYDSVTRQKEPRAPWMAENLAPDHW   | 60  |
| chimpanzee      | RTHSLRYFRLGVSDPIHGVPFISVGYVDSHPITTYDSVTRQKEPRAPWMAENLAPDHW   | 60  |
| orangutan       | RTHSLRYFRLGVSDPIRGVPFISVGYVDSHPITTYDSVTRQKEPRAPWMAENLAPDHW   | 60  |
| sheep           | RTHSLRYFRLGISSEPGYGIPEFISAGYVDSHPITMYSVSQLKEPRAPWMAENLEPDHW  | 60  |
| bovine          | RTHSLRYFRLGISSEPGYGIPEFISAGYVDSHPITMYSVSQLKEPRALWMEENLAPDHW  | 60  |
| pig             | -THSLRYFRLGISDPGHEMPEFISVGYVDSHPITTYDSVSRQKEPRAPWMAENLEPDHW  | 59  |
| rat             | RTHSLRYFRLAISDPGPGVPEFISVGYVDSHPITTYDSVTRQKEPRAPWMAENLAPDHW  | 60  |
| mouse           | RTHSLRYFRLAVSDPGVPVPEFISVGYVDSHPITTYDSVTRQKEPKAPWMAENLAPDHW  | 60  |
| Tasmanian devil | RTHSLRYFRLGVSDSTQGIPEFISVGYVDSHPITSYDSIRRQKMPQASWMEENLGS DHW | 60  |
| opossum         | -THSLRYFRLGLSDSNQGMPEFISVGYVDSHPITSYDSNGRQKMPQASWMEENLGS DHW | 59  |
|                 | ***** * ***** * * * * * * * * * *                            |     |
| human           | RYTQLLRGWQQMFVKELKRLQRHYNHSG-SHTYQRMIGCELLEDGSTTGFLQYAYDGQDF | 119 |
| chimpanzee      | RYTQLLRGWQQMFVKELKRLQRHYNHSG-SHTYQRMIGCELLEDGSTTGFLQYAYDGQDF | 119 |
| orangutan       | RYTQLLRGWQQMFVKELKRLQRHYNHSG-SHTYQRMIGCELLEDGSTTGFLQYAYDGQDF | 119 |
| sheep           | RYTQLLRGWQQAFKVELKQLQHYNHSG-FNTYQRMIGCELLDDGSTTGFLQYAYDGQDF  | 119 |
| bovine          | RYTQLLRGWQQAFKVELKQLQHYNHSG-FHTYQRMIGCELLEDGSTTGFLQYAYDGQDF  | 119 |
| pig             | RYTQLLRGWQQTFFKELKQLQRHYNHSG-LHTYQRMIGCELLEDGSTTGFLQYAYDGQDF | 118 |
| rat             | RYTQLLRGWQRTFQTELRLQRHYNHSG-LHTYQRMIGCELLEDGSTTGFLQYAYDGQDF  | 119 |
| mouse           | RYTQLLRGWQQTFFKELRLQRHYNHSG-LHTYQRMIGCELLEDGSTTGFLQYAYDGQDF  | 119 |
| Tasmanian devil | KYTQLLRGWQQTFFKELRLQNHYNTGGFHTYQRMIGCELLEDGSTTGFLQYAYDGKDF   | 120 |
| opossum         | KYTQLLRGWQQTFFKIELRALQNHYNTGGFHIYQRMIGCELLEDGSTTGFLQYAYDGKDF | 119 |
|                 | ***** * * * * * * * ***** * * * * * * * *                    |     |
| human           | LIFNKDTLSWLAVDNVAHTIKQAEANQHellyQKNWLEEECIAWLKRFLEYGKDTLQRT  | 179 |
| chimpanzee      | LIFNKDTLSWLAVDNVAHTIKQAEANQHellyQKNWLEEECIAWLKRFLEYGKDILQRT  | 179 |
| orangutan       | LIFNKDTLSWLAVDNVAHTIKQAEANQHellyQKNWLEEECIAWLKRFLEYGKDTLQRT  | 179 |
| sheep           | LIFNKDTLSWIAMDNVANIIRRAWEANRHELQYQKNWLEEECIAWLKRFLEYGKDTLQRT | 179 |
| bovine          | LIFNKDTLSWAMDNVADIIRRVWEANRHELQYQKNWLEEECIAWLKRFLEYGKDALQRT  | 179 |
| pig             | LIFNKDTLSWAMDNVVAHTIKQAEANWHELQYQKNWLEEECIAWLKRFLEYGKDTLQRT  | 178 |
| rat             | IVFDKDTLSWLAMDVAHTIKQAEANLHELQYQKNWLEEECIAWLKRFLEYGSDALERT   | 179 |
| mouse           | LIFNKDTLSWLAMDVAHTIKQAEANLHELQYQKNWLEEECIAWLKRFLEYGRDTLERT   | 179 |
| Tasmanian devil | LIFDKDTLSWLAVDNVARLTQQVWETNLNELRYQKNWLETECIAWLKKFLDFGKDSFQRT | 180 |
| opossum         | IVFNKESLSWIAMDNVARLTQQAEANRNLRYQKNWLETECIAWLKKFLDFGKDTLQRT   | 179 |
|                 | * * * * * * * * * * * * * * * * * * * * *                    |     |
| human           | EPPLVRVNRKETFPGVTLFCKAHGFYPPEIYMTWMKNGEEIVQEIDYGDILPSGDGTQ   | 239 |
| chimpanzee      | EPPLVRVNRKETFPGVTLFCKAHGFYPPEIYMTWMKNGEEIVQEIDYGDILPSGDGTQ   | 239 |
| orangutan       | EPPLVRVNRKETFPGVTLFCKAHGFYPPEIYMTWMKNGEEIVQEMDYGDILPSGDGTQ   | 239 |
| sheep           | EPPKVRVNYKETFPGITTLFCRAHGFYPPEISINWMKNGEEVVDQTNYGGLPSGDGTQ   | 239 |
| bovine          | EPPKVRVNHKETFPGITTLFCRAHGFYPPEISINWMKNGEEIFQDQDYGGILPSGDGTQ  | 239 |
| pig             | EPPLVRVYHKETVPGITTLFCRAHGFYPPEISMTWMKNEEEMVQEMDYGDILPSGDGTQ  | 238 |
| rat             | EHPVVRTTRKETFPGITTLFCRAHGFYPPEISMIWKNGEEIVQEVYGGVLPSPGDGTQ   | 239 |
| mouse           | EHPVVRTTRKETFPGITTLFCRAHGFYPPEISMTWMKNGEEIAQEVYGGVLPSPGDGTQ  | 239 |
| Tasmanian devil | EPPLRGSKCKSSLGITTLICRAHGFYPPEITMTWIKNGELIQEIEYGDILPSGDGTQ    | 240 |
| opossum         | ETPLSGSKCKSSGITTLICRAYGFYPPEITMTWIKNGELITQIEHGDILPSGDGTQ     | 239 |
|                 | * * * * * * * * * * * * * * * * * * * * *                    |     |
| human           | AWASIELDPQSSNLYSCHVEHCGVHMLQVPQ                              | 271 |
| chimpanzee      | TWASVELDPQSSNLYSCHVEHCGVHMLQVPQ                              | 271 |
| orangutan       | TWASVELDPQSSNLYSCHVEHCGVHMLQVPQ                              | 271 |
| sheep           | TWVSVELDSQNGDIYSCHVEHGGVHMLPGFQ                              | 271 |
| bovine          | TWVSVELDPQNGDIYSCHVEHGGVHMLQGFQ                              | 271 |
| pig             | TWVSVELDSQSSDVYSCHVHCGVHTVLQGAR                              | 270 |
| rat             | MWVSVDLDPQTKDIYSCHVEHCGVHMLQVPQ                              | 271 |
| mouse           | TWLSVNLDPQSNVYSCHVEHCGVHMLQVPQ                               | 271 |
| Tasmanian devil | TWISIEIDPQSKDHYFCQVEHNDFLKVLHVPQ                             | 272 |
| opossum         | TWVSIDIDPQSKDHYSCQVEHNNFLKVLHVPQ                             | 271 |
|                 | * * * * * * * * * *                                          |     |

Sequence alignment of MR1 from various species. Identical residues are shown as \*. Residues that contact 6-FP are conserved in all species and are highlighted in yellow.

Supplementary Figure 8. Specific activation of Jurkat.MAITs by APCs infected with *Salmonella*.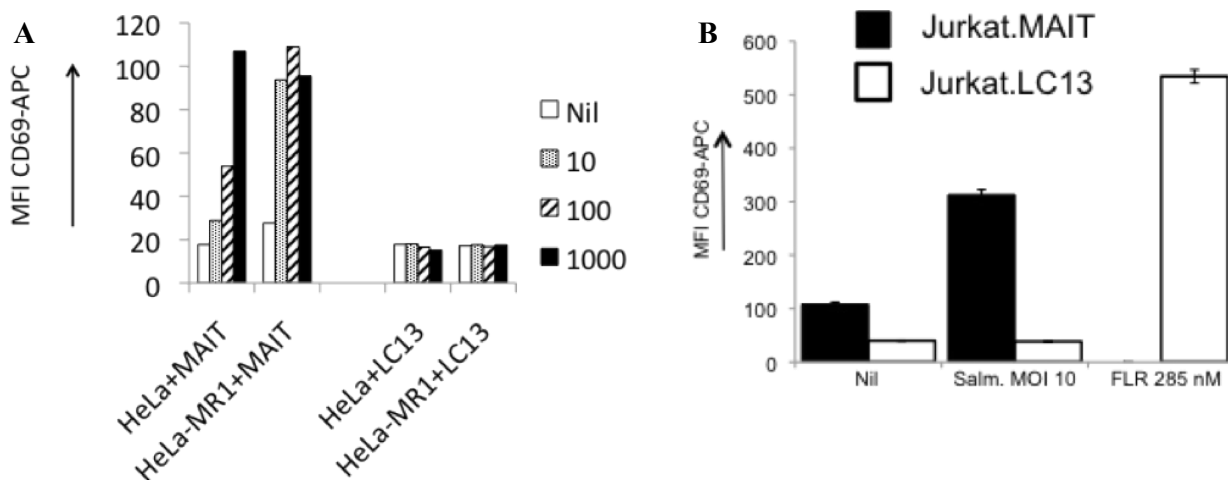

**(A)** HeLa antigen presenting cells infected by *Salmonella* fail to activate Jurkat cells expressing an Epstein-Barr virus-specific TCR. HeLa cells, or HeLa cells transduced with MR1 (HeLa-MR1) were either not infected (open bars), or were infected with *Salmonella typhimurium* at a multiplicity of infection of 10 (stippled bars), 100 (hatched bars) or 1000 (black bars), following which Jurkat cells expressing either a MAIT TCR (MAIT; utilizing a TRBV6-1  $\beta$  chain) or the virus-specific T cell receptor LC13 were added for 18 hours before staining for CD69 cell surface expression and analysis by flow cytometry. Shown is mean fluorescence intensity of staining (MFI CD69-APC) on the Y-axis versus cell treatment on the X-axis.

**(B)** C1R antigen presenting cells transduced with MR1 and infected by *Salmonella* fail to activate Jurkat cells expressing an Epstein-Barr virus-specic TCR. C1R cells transduced with MR1 were either not infected (Nil) or infected with *Salmonella typhimurium* at a multiplicity of 10 (Salm. MOI 10), following which Jurkat cells expressing either a MAIT TCR (Jurkat.MAIT; utilizing a TRBV6-1  $\beta$  chain) or the virus-specific T cell receptor LC13 (Jurkat.LC13) were added for 18 hours before staining for CD69 cell surface expression and analysis by flow cytometry. Shown is mean fluorescence intensity of staining (MFI CD69-APC, expressed as mean  $\pm$  SEM from triplicate samples) on the Y-axis versus cell treatment on the X-axis. Jurkat.LC13 cells were also separately incubated with the activating Epstein-Barr virus peptide FLRGRAYGL (FLR, at 285 nM) and C1R cells expressing the restriction element HLA-B8.

**Supplementary Figure 9. Negative (i) and positive (ii) ion mode data (50-1000amu)****(i)**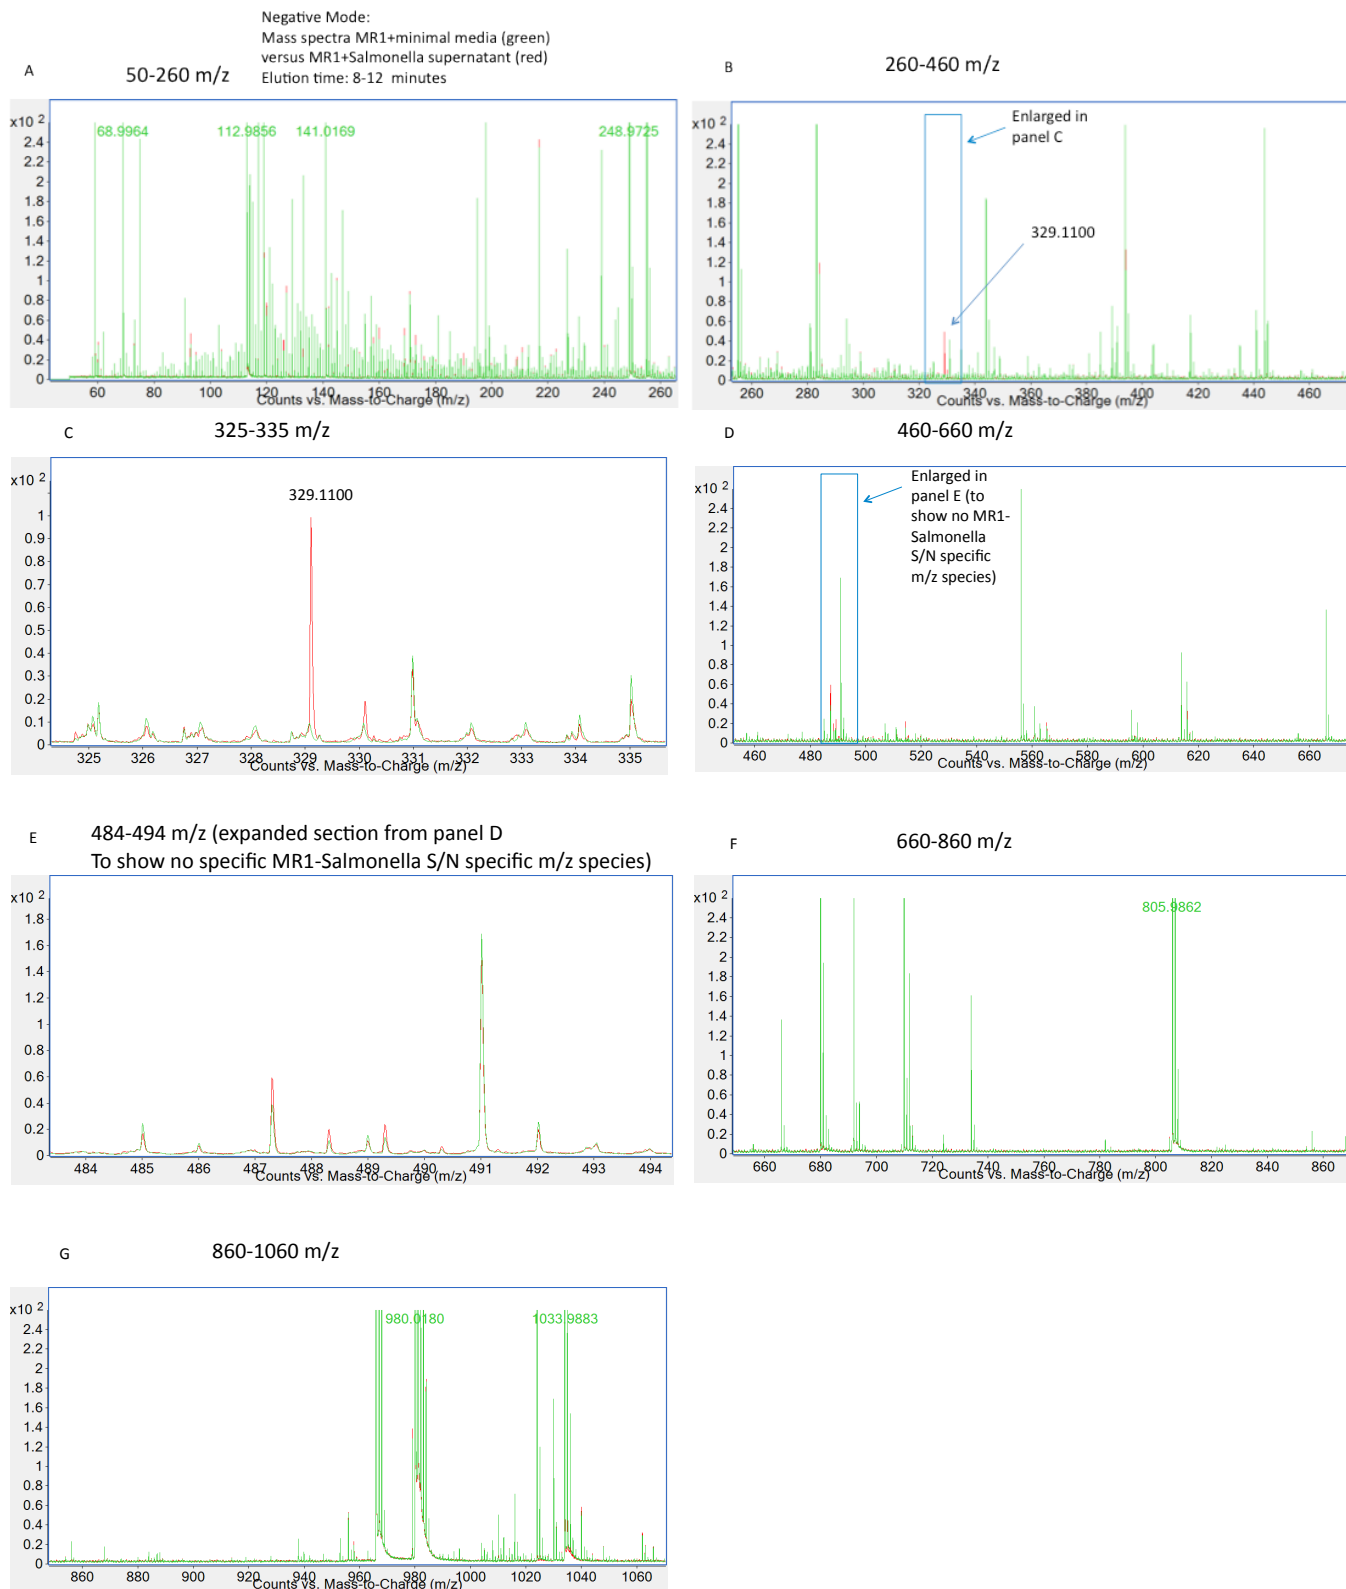

(ii)

Positive Mode:  
Mass spectra MR1+minimal media (green)  
versus MR1+*Salmonella* supernatant (red)  
Elution time: 8-12 minutes

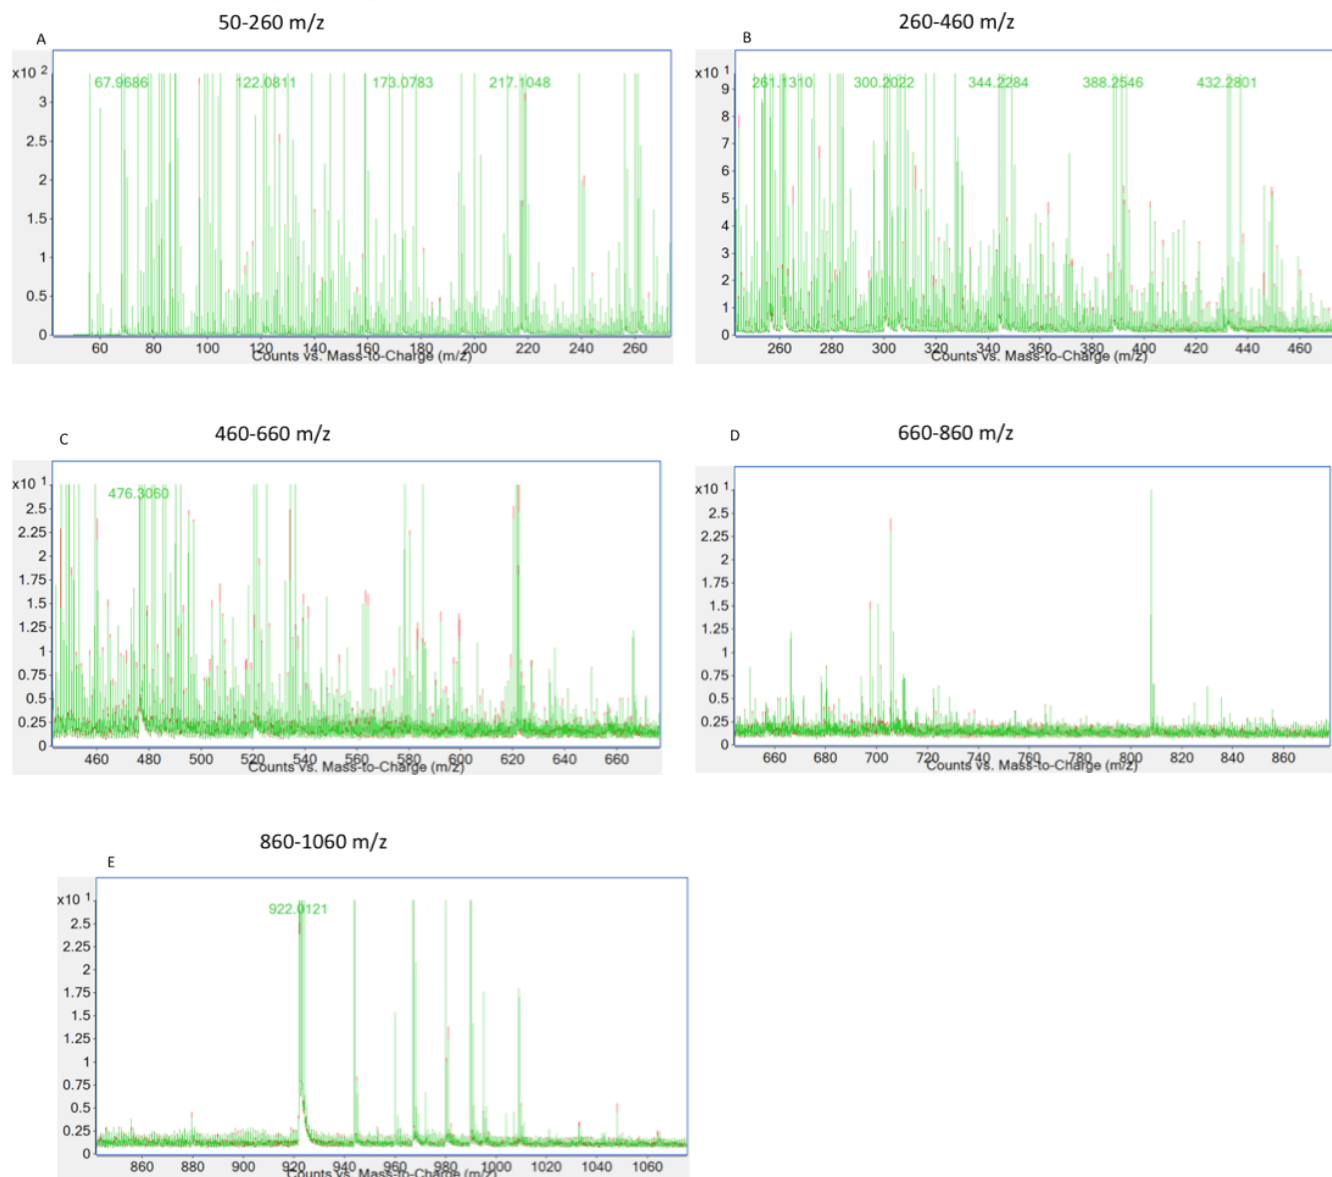

MR1 refolded in the presence of minimal medium (green mass spectra) or in the presence of filtered supernatant from *Salmonella* cultured in the same minimal medium (red mass spectra), was loaded onto an XBridge C18 reversed phase column (Waters) and bound metabolites detected in an Agilent electrospray ionization time-of-flight (ESI TOF) mass spectrometer operating in both negative (i) or positive (ii) ion modes. Mass spectra were collected from 8-12 minutes (the 329.1100 m/z negative ion mode species has a retention time of 10.4 minutes). No m/z species unique to MR1 plus *Salmonella* supernatant were detected outside this elution time window (i.e. from 5-8 minutes and 12-16 minutes (not shown). (elution gradient performed was: 0-100% B [B: 80% acetonitrile] from 5-15 minutes) Shown in i) are mass spectra collected in negative ion mode from A) 50-260 m/z; B) 260-460 m/z; C) an expanded panel focusing on m/z from 325 to 335 to highlight the unique 329.1100 species detected with MR1 plus *Salmonella* supernatant; D) 460-660 m/z; E) an expanded panel focusing on m/z from 484 to 494 to highlight that no specific MR1 plus *Salmonella* supernatant m/z species are present within the 460-660 m/z panel; F) 660-860 m/z; and G) 860-1060 m/z. Shown in ii) are mass spectra collected in positive ion mode from A) 50-260 m/z; B) 260-460 m/z; C) 460-660 m/z; D) 660-860 m/z; and E) 860-1060 m/z.

### Supplementary Figure 10. Anti-MR1 blocking of Jurkat.MAIT (TRBV6.4 and TRBV20) activation by riboflavin intermediates

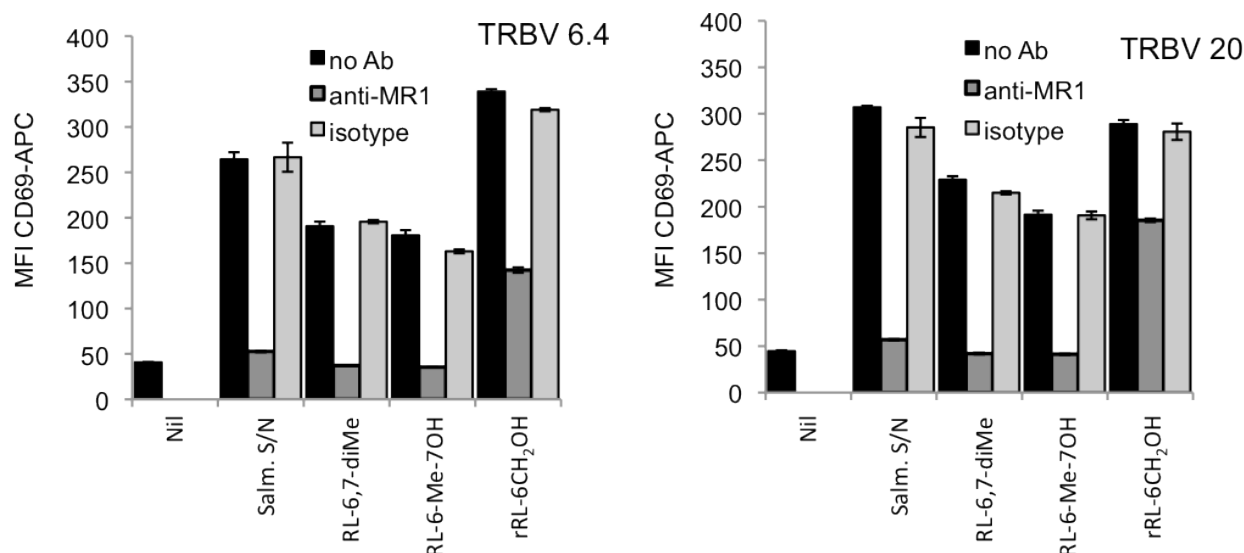

#### MR1-specific blocking of MAIT cell activation

C1R-huMR1.19 cells ( $10^5$ /well) were preincubated with the MR1-specific Ab 26.5 (20  $\mu$ g/ml), isotype control W6/32 or no Ab for 2 hr. Jurkat.MAIT cells ( $10^5$ /well) expressing the TRBV6.4 (Left hand panel) or TRBV20 MAIT TCR (Right hand panel) were added along with supernatant (2.0  $\mu$ l added) or compounds (RL-6,7-diMe, RL-6-Me-7-OH, 76  $\mu$ M final, or rRL-6-CH<sub>2</sub>OH: 15.2  $\mu$ M final) in RF-10 and incubated overnight at 37°C. CD69 expression was analysed by flow cytometry. Graph shows MFI of gated Jurkat.MAIT cells (CD3<sup>+</sup>, GFP<sup>low</sup>) expressed as mean  $\pm$  SEM from triplicate samples. In each case activation of MAIT cells was blocked by MR1-specific Ab 26.5, but not by the isotype control W6/32. These results were part of an experiment conducted on same day as data shown in Figure 5a,b.

**Supplementary Figure 11. The D5 Mab is specific for V $\alpha$ 7.2  $\alpha$ -chain.**

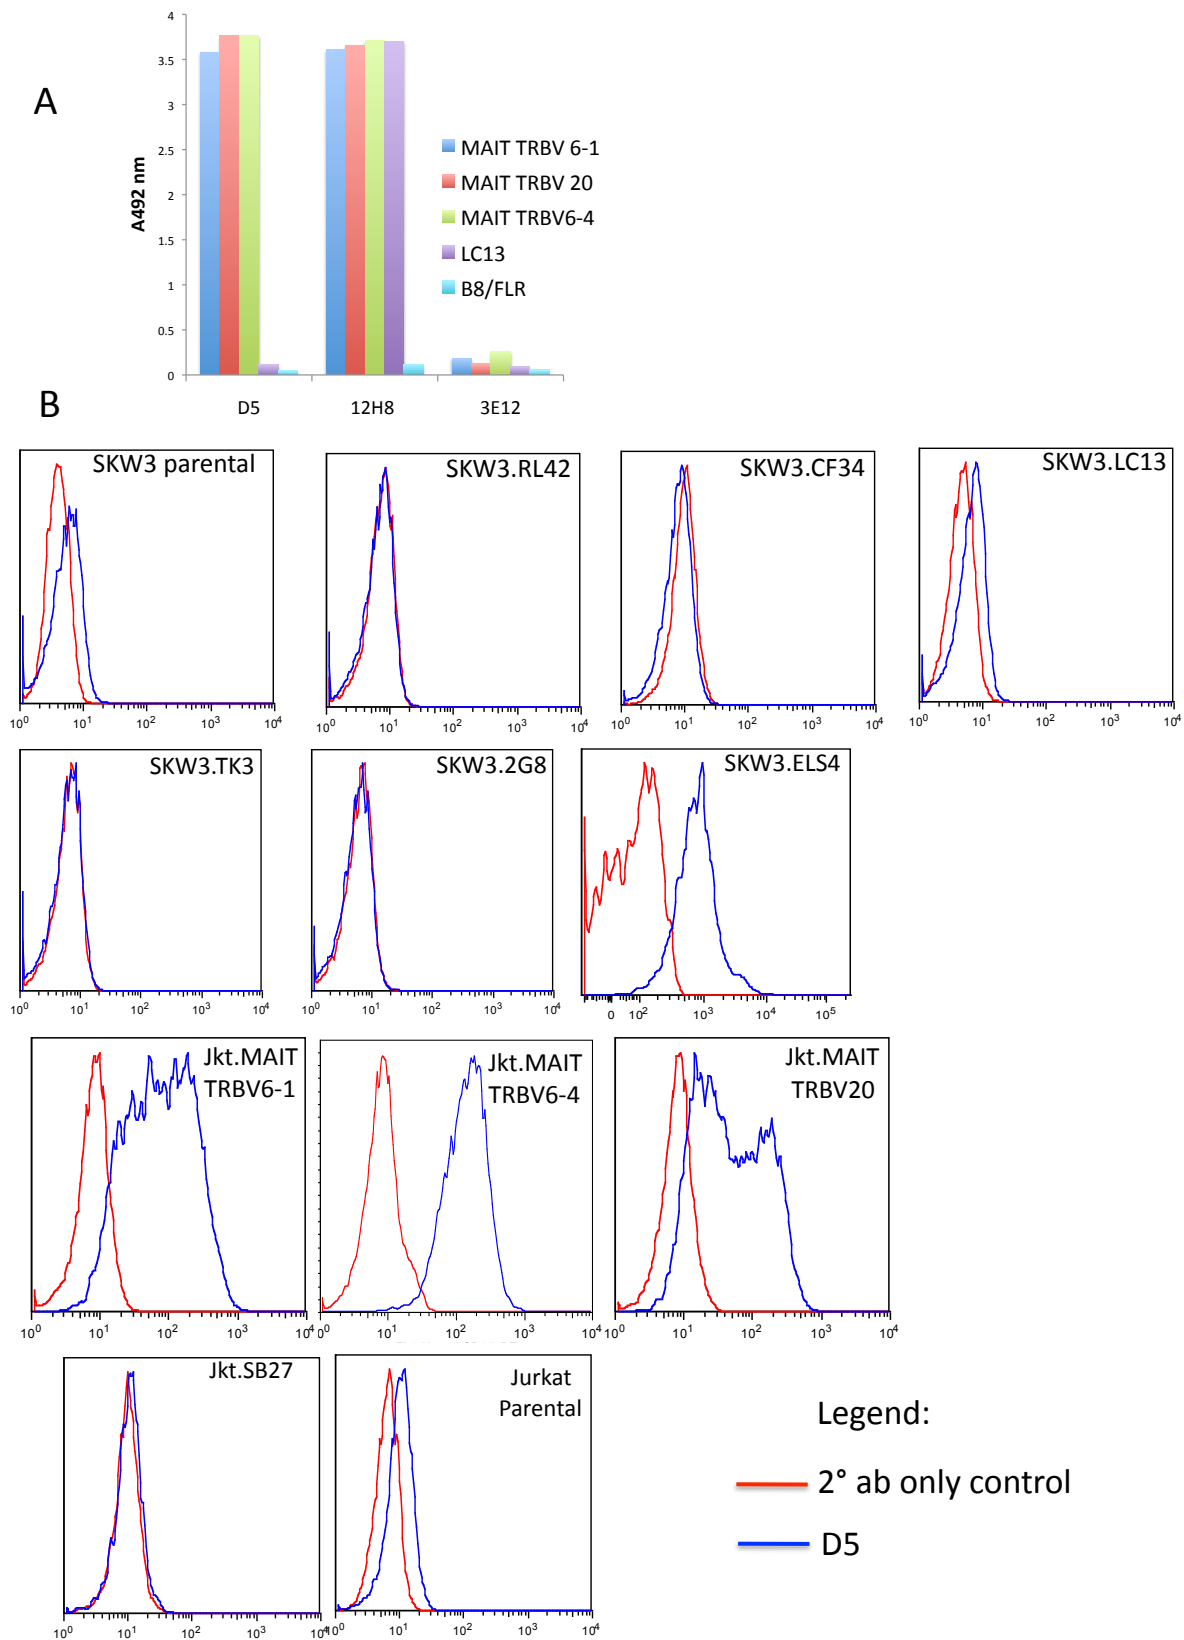

**(A) The D5 mAb binds to soluble MAIT TCRs.**

ELISA plates coated with the soluble refolded TCRs MAIT-TRBV6-1, MAIT-TRBV6-4, MAIT-TRBV20, LC13, or control HLA-B8 at 10 µg/ml were probed with the mAb D5, the TCR constant domain-reactive mAb 12H8, or a control mAb 3E12 (reactive against HLA-B57). Bound antibody was detected with a secondary HRP-conjugated anti-mouse IgG antibody and o-phenylenediamine substrate, with absorption at 492 nm shown on the Y-axis.

**(B) Staining of TCR-transduced cell lines with the mAb D5.**

SKW and Jurkat cells were either not transduced, or transduced with a panel of alpha and beta TCR genes encoding the T cell receptors: RL42 (Gras, JI 2012), CF34 (Gras, Immunity 2009), LC13 (Kjer-Nielsen, Immunity 2003), TK3 (Gras JEM 2010), 2G8 (Eckle, unpublished), or ELS4 (Tynan, NI 2007) (SKW cells, upper panels); or MAIT-TRBV6-1, MAIT-TRBV6-4, MAIT-TRBV20 (Reantragoon JEM 2012), or SB27 (Tynan NI 2005) (Jurkat cells, lower panels) as indicated, and stained by indirect immunofluorescence with the mAb D5 (the secondary antibody used was PE-conjugated anti-mouse IgG antibody), and subsequently analysed by flow cytometry. Shown are histogram FACS plots with intensity of staining on the X-axis. Shown below is the gene usage of the TCRs used to confirm specificity of the D5 MAb. Note that ELS4 shares the same TCR  $\alpha$ -chain as the MAIT TCR, thereby confirming specificity of the D5 Mab for TRAV1-2 ( $V\alpha 7.2$ )

| SKW3 parental |  | RL42 | CF34 | LC13 |
|---------------|--|------|------|------|
| TRAV          |  | 12-1 | 14   | 26-2 |
| TRAJ          |  | 23   | 49   | 52   |
| TRBV          |  | 6-2  | 11-2 | 7-8  |
| TRBJ          |  | 2-4  | 2-3  | 2-7  |

  

| TK3  |     | 2G8    | ELS4    |
|------|-----|--------|---------|
| TRAV | 20  | 5*01   | 1-2     |
| TRAJ | 58  | 29*01  | 6       |
| TRBV | 9   | 13*01  | 10-3*02 |
| TRBJ | 2-2 | 2-2*01 | 1-5*01  |

  

| MAIT 6-1 |     | MAIT 6-4 | MAIT20 |
|----------|-----|----------|--------|
| TRAV     | 1-2 | 1-2      | 1-2    |
| TRAJ     | 33  | 33       | 33     |
| TRBV     | 6-1 | 6-4      | 20-1   |
| TRBJ     | 1-2 | 2-1      | 2-1    |

  

| SB27 |     | Jurkat parental |
|------|-----|-----------------|
| TRAV | 19  |                 |
| TRAJ | 34  |                 |
| TRBV | 6-1 |                 |
| TRBJ | 2-7 |                 |

**Supplementary Figure 12. Riboflavin metabolites, non-MAIT cells and MAIT cells**

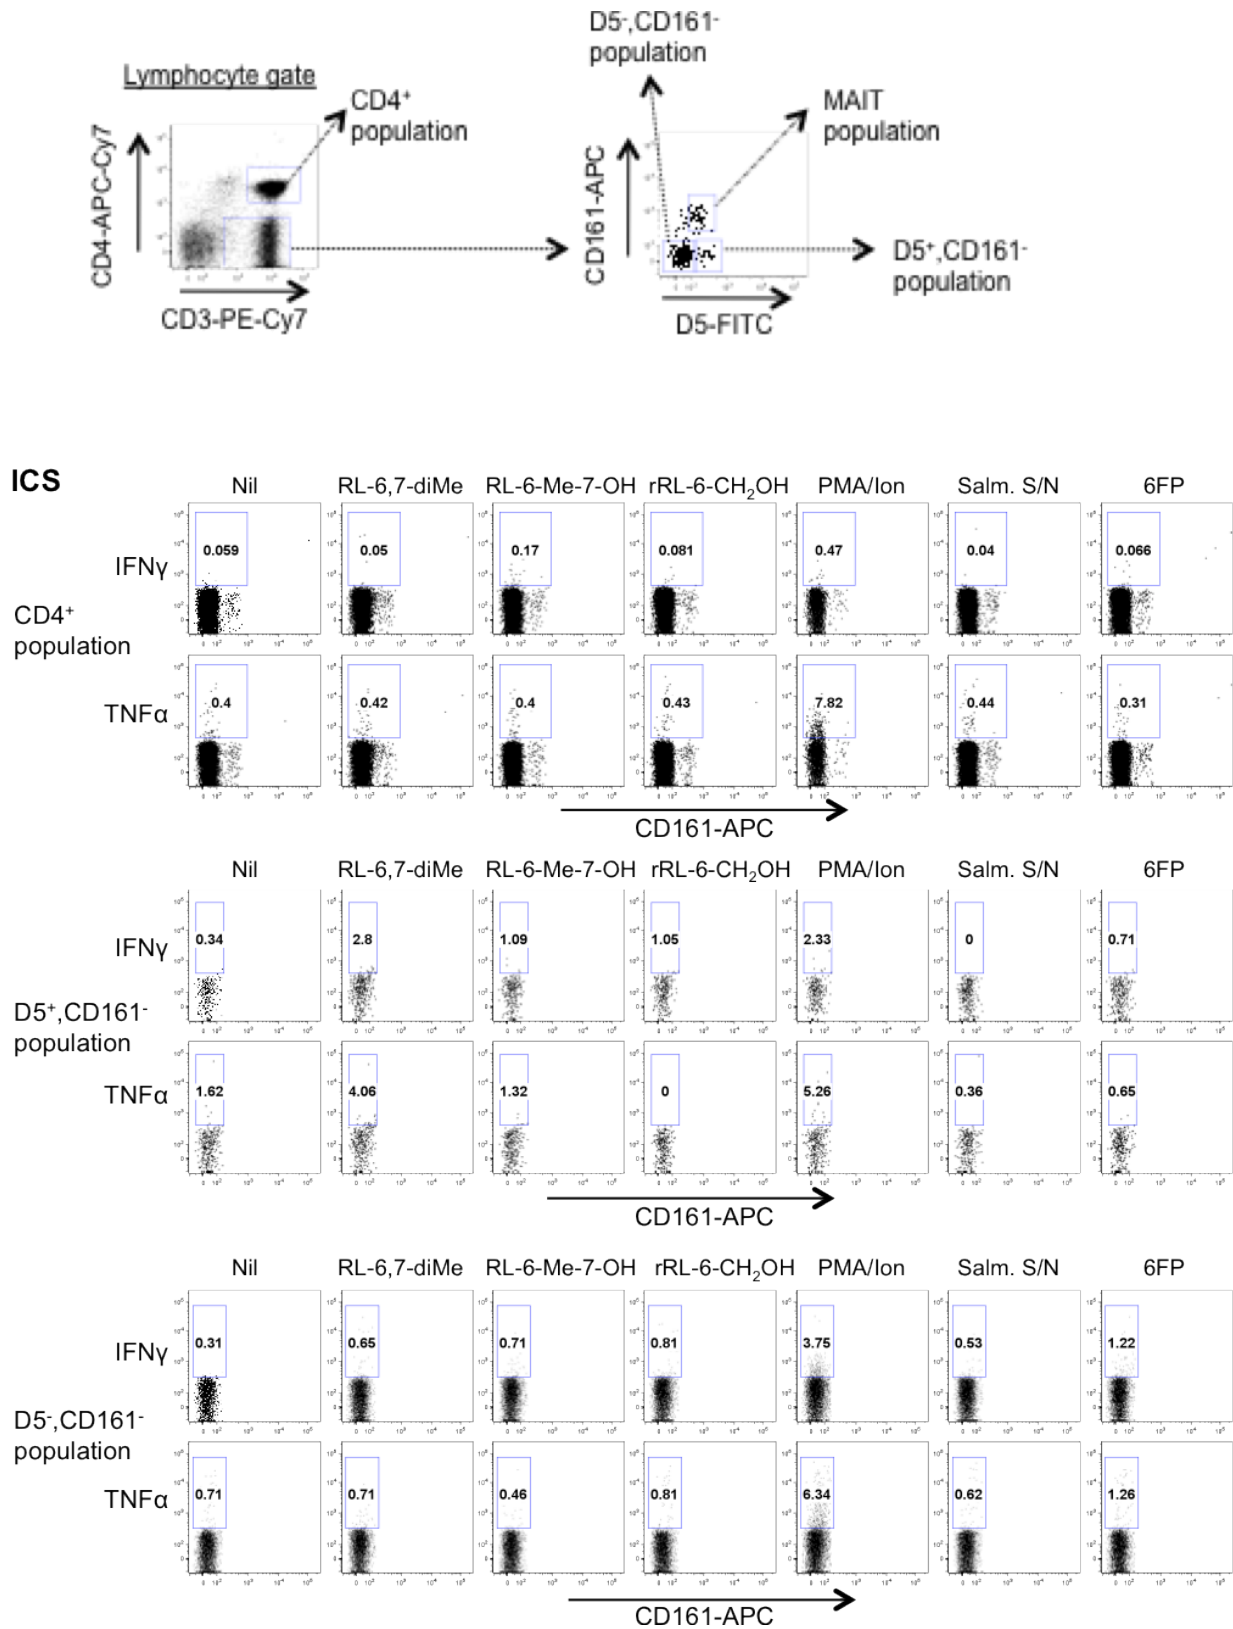

Upper panels: gating strategies for CD4<sup>+</sup>; D5<sup>+</sup>/CD161<sup>-</sup>; and D5<sup>-</sup>/CD161<sup>-</sup> populations of CD3-positive lymphocytes.

Lower three sets of panels: ICS. PBMCs were mixed with C1R cells expressing MR1 ( $10^5$  each/well) and *Salmonella* supernatant (Salm. S/N; 2  $\mu$ l); or compounds (RL-6,7-diMe, RL-6-Me-7-OH, 6-FP: 76.2  $\mu$ M final, rRL-6-CH<sub>2</sub>OH: 0.152  $\mu$ M final); or PMA and ionomycin (PMA/Ion; 2 ng/ml and 1 ng/ml respectively) in 220  $\mu$ l RF-10 and incubated at 37 °C. After 1 hr incubation, 10  $\mu$ M brefeldin A was added and cells incubated overnight. Cells were stained for surface markers, fixed in 1% paraformaldehyde and permeabilised with 1% saponin prior to intracellular cytokine staining. Plots show gated cells from the same three non-MAIT populations with staining for IFN $\gamma$  or TNF on the Y-axis versus CD161-APC staining on the X-axis for one representative sample from three.

## Supplementary Figure 13. Synthesis of the ribityl lumazines

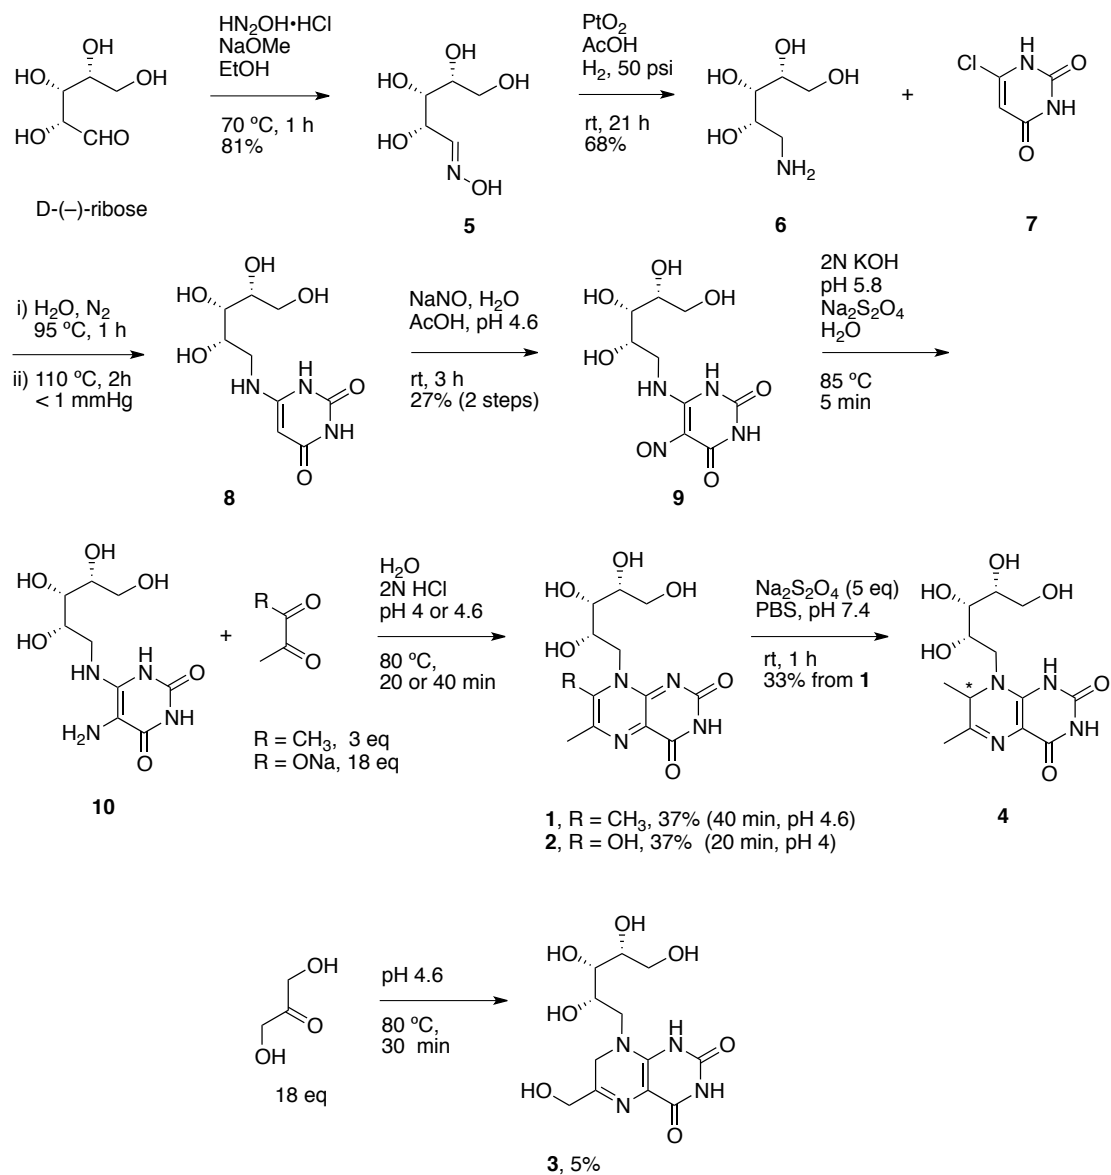

Supplement: 41586_2012_BFnature11605_MOESM489_ESM.pdf [file 41586_2012_BFnature11605_MOESM489_ESM.pdf]
